# Supplementary material for: 2′,4′-BNA bearing a 2-pyridine nucleobase for CG base pair recognition in the parallel motif triplex DNA
Source: Royal Society of Chemistry journal article supplement (doi:10.1039/c004895j), 2010-01-01

## Electronic Supplementary Information

### 2',4'-BNA Bearing a 2-Pyridine Nucleobase for CG Base Pair Recognition in the Parallel Motif Triplex DNA

Yoshiyuki Hari,\*<sup>a</sup> Sachiko Matsugu,<sup>a</sup> Hiroyasu Inohara,<sup>a</sup> Yuri Hatanaka,<sup>a</sup> Masaaki Akabane,<sup>a</sup>  
Takeshi Imanishi<sup>a</sup> and Satoshi Obika\*<sup>a,b</sup>

<sup>a</sup>*Graduate School of Pharmaceutical Sciences, Osaka University, 1-6 Yamadaoka, Suita, Osaka 565-0871, Japan.*

<sup>b</sup>*PRESTO, JST, Sanbancho Building, 5-Sanbancho, Chiyodaku, Tokyo 102-0075, Japan.*

### Contents

|                                                              |      |         |
|--------------------------------------------------------------|------|---------|
| <sup>1</sup> H and <sup>13</sup> C spectra for new compounds | Page | S2 - S6 |
| NOESY spectra for compounds <b>3</b> and <b>4</b>            | Page | S7      |

### Compound 3

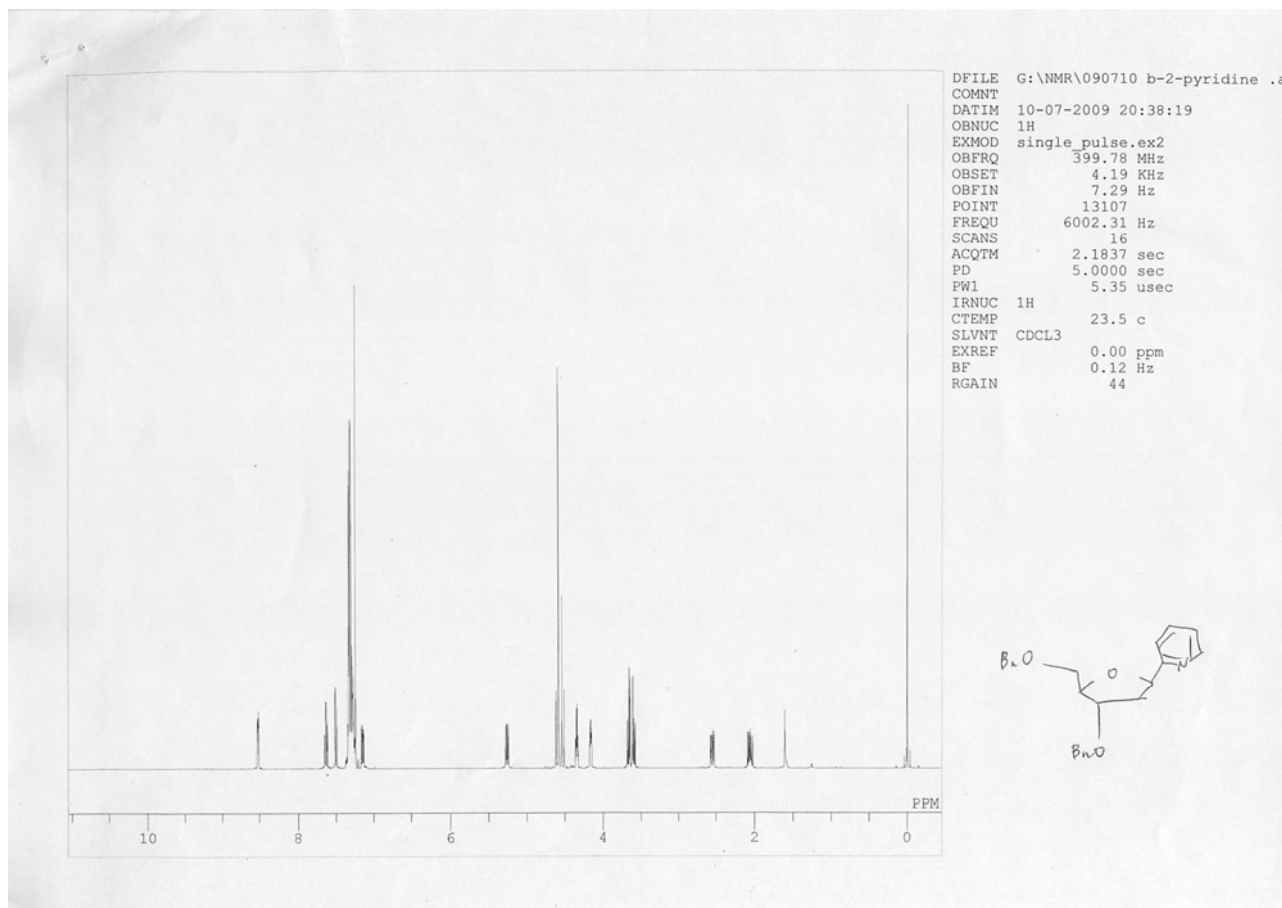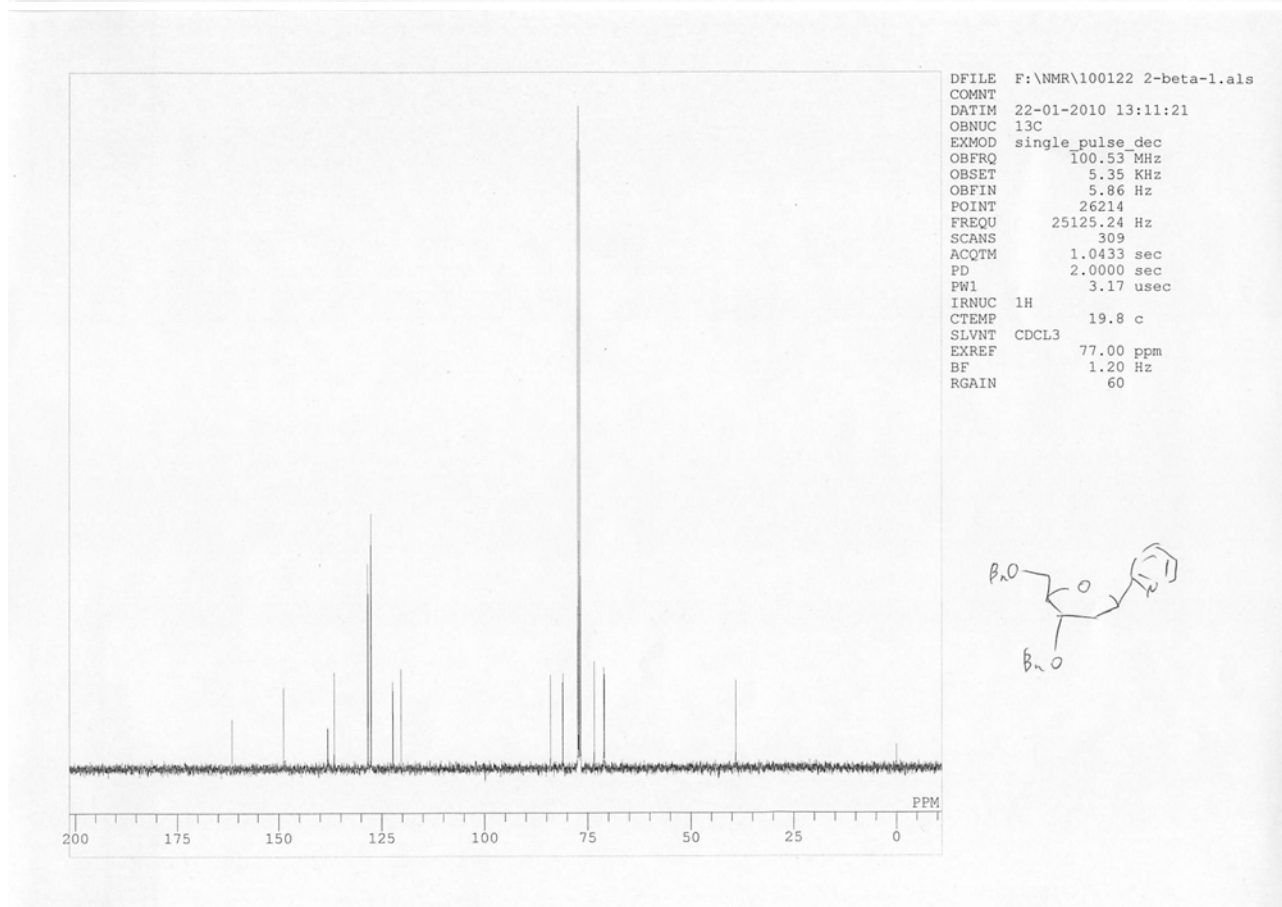

### Compound 4

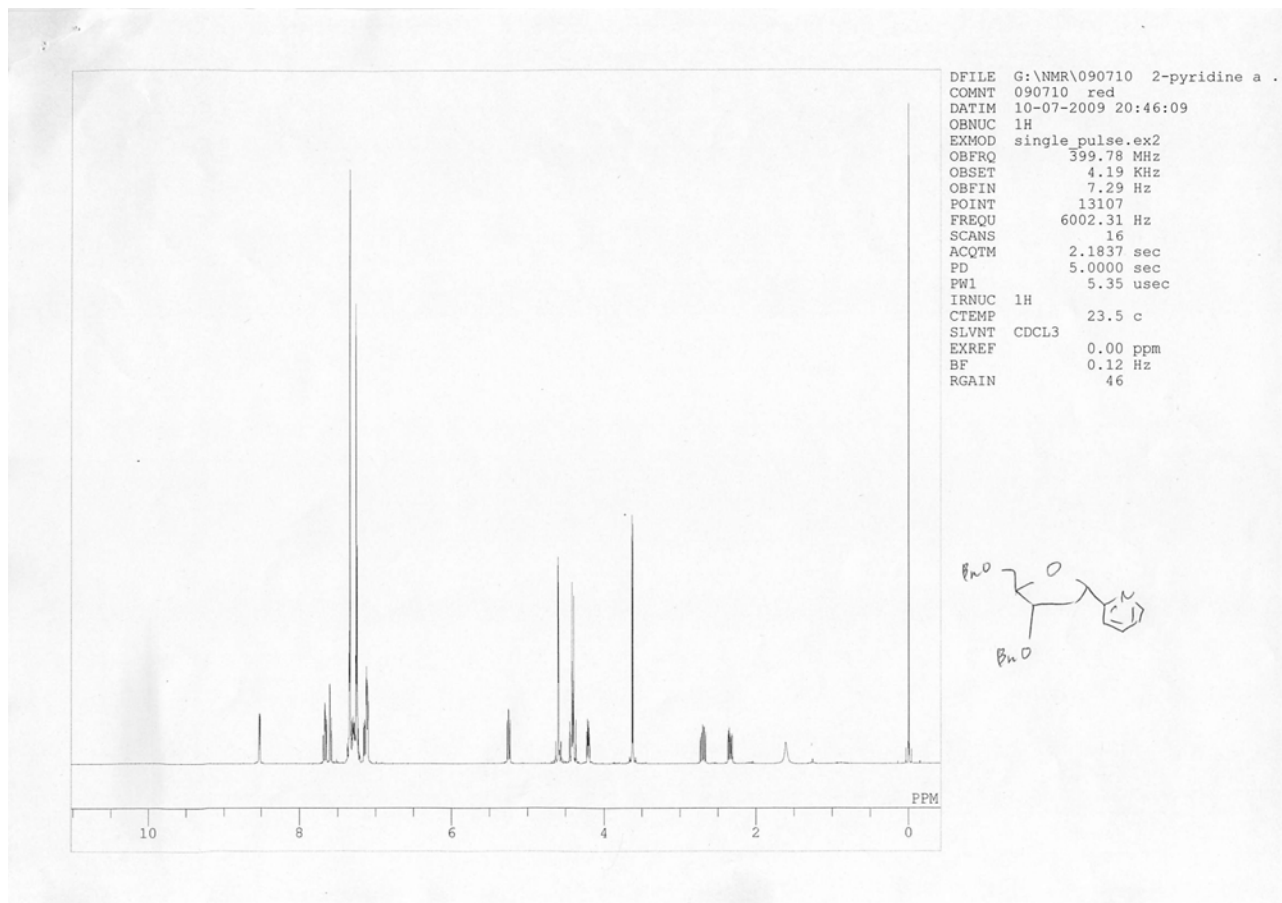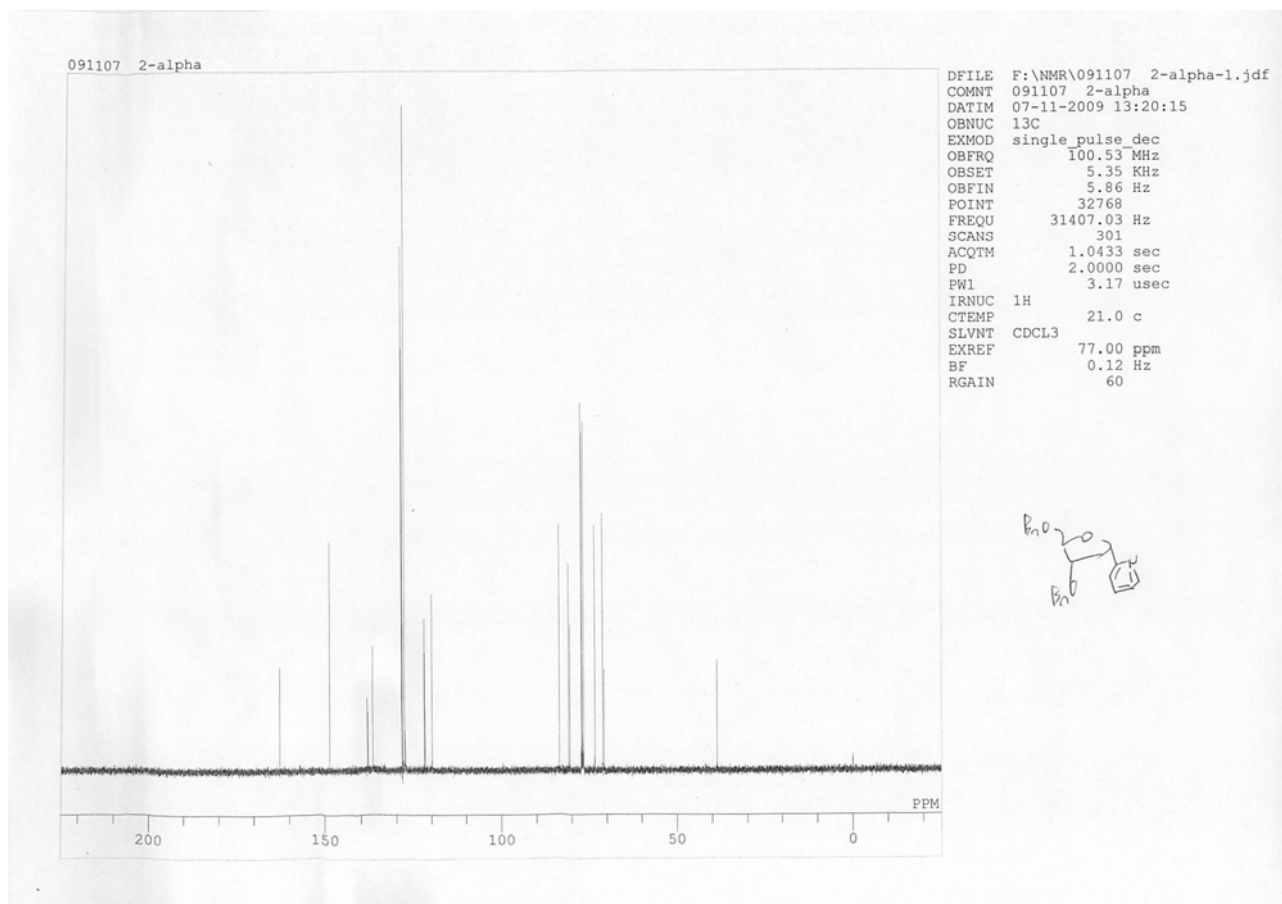

### Compound 6

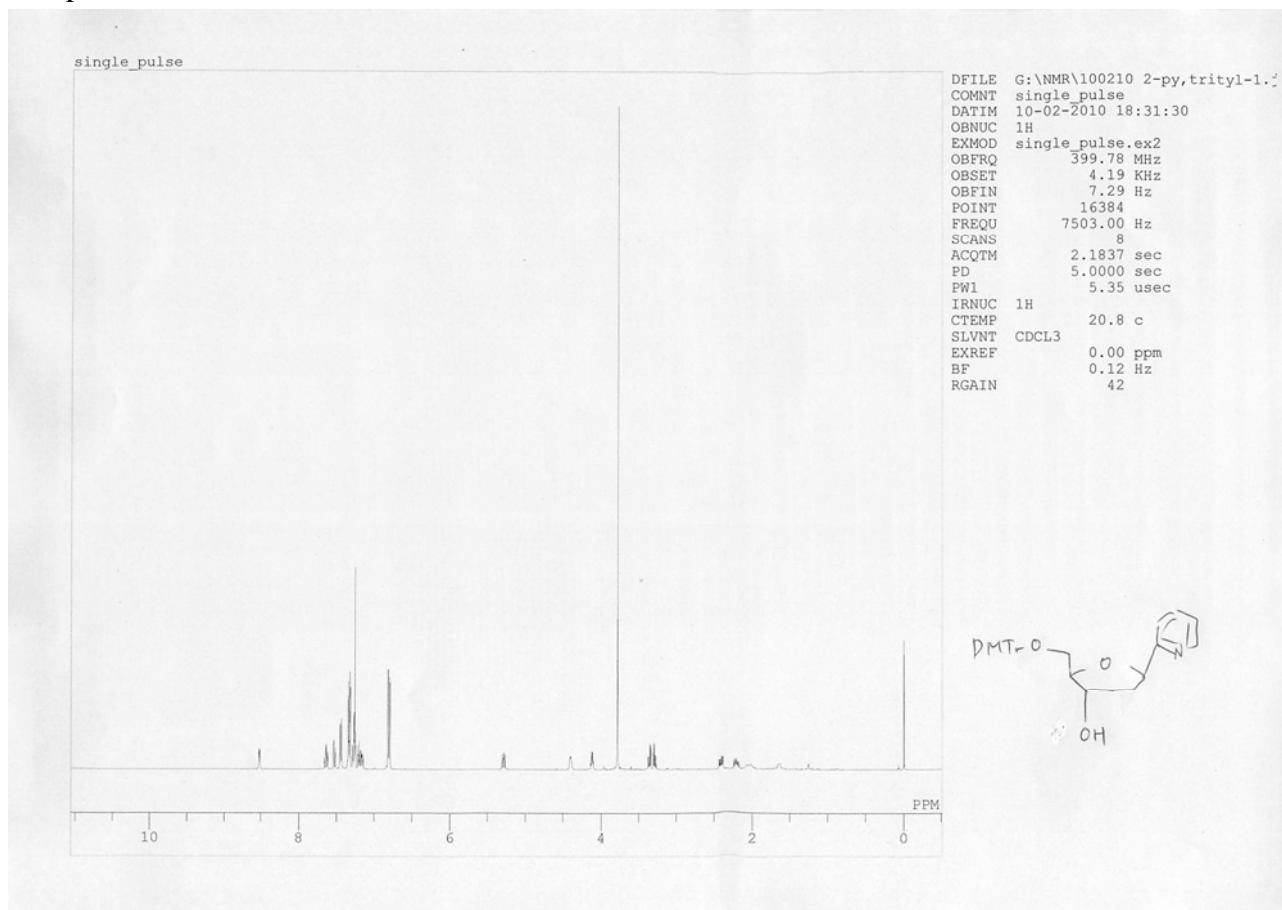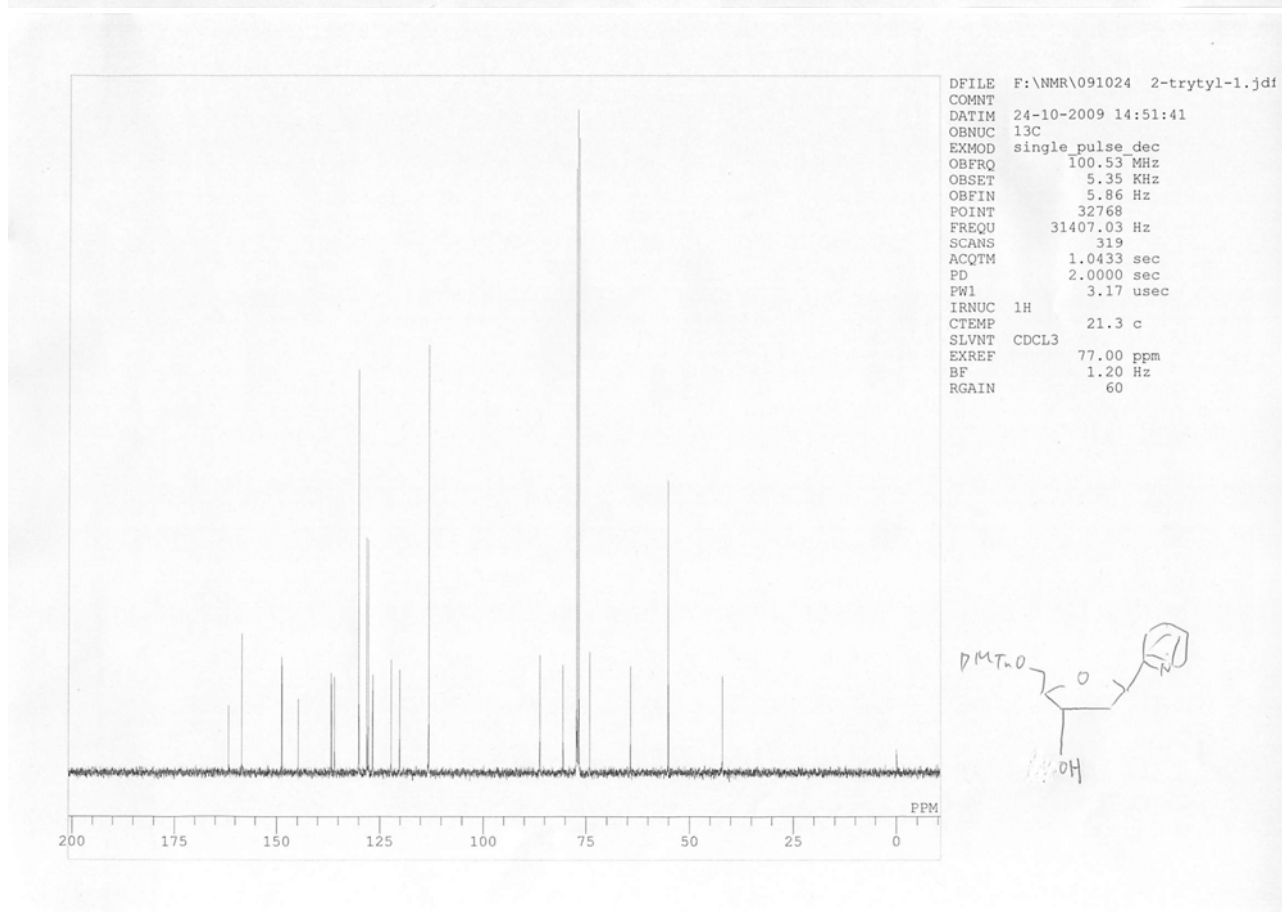

### Compound 9

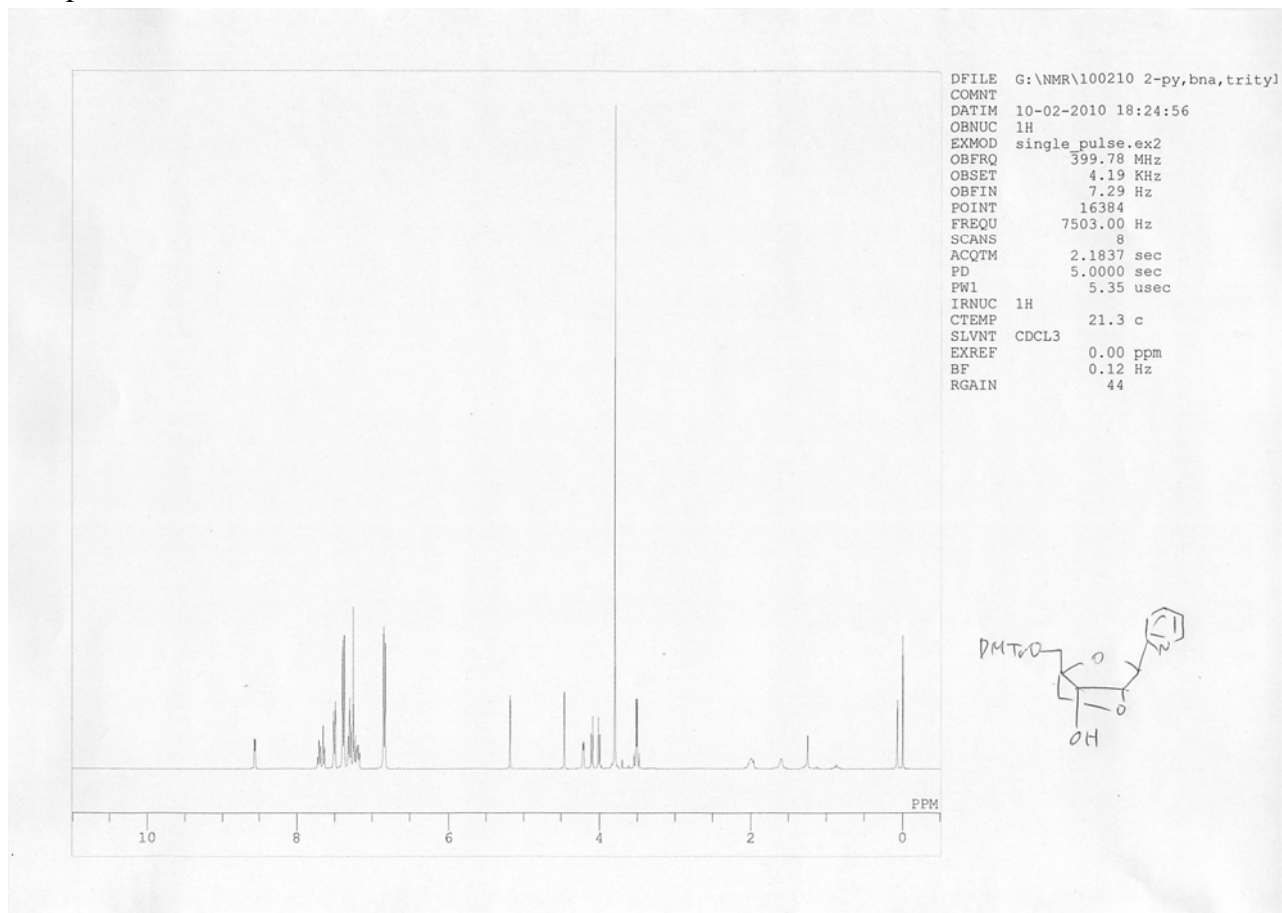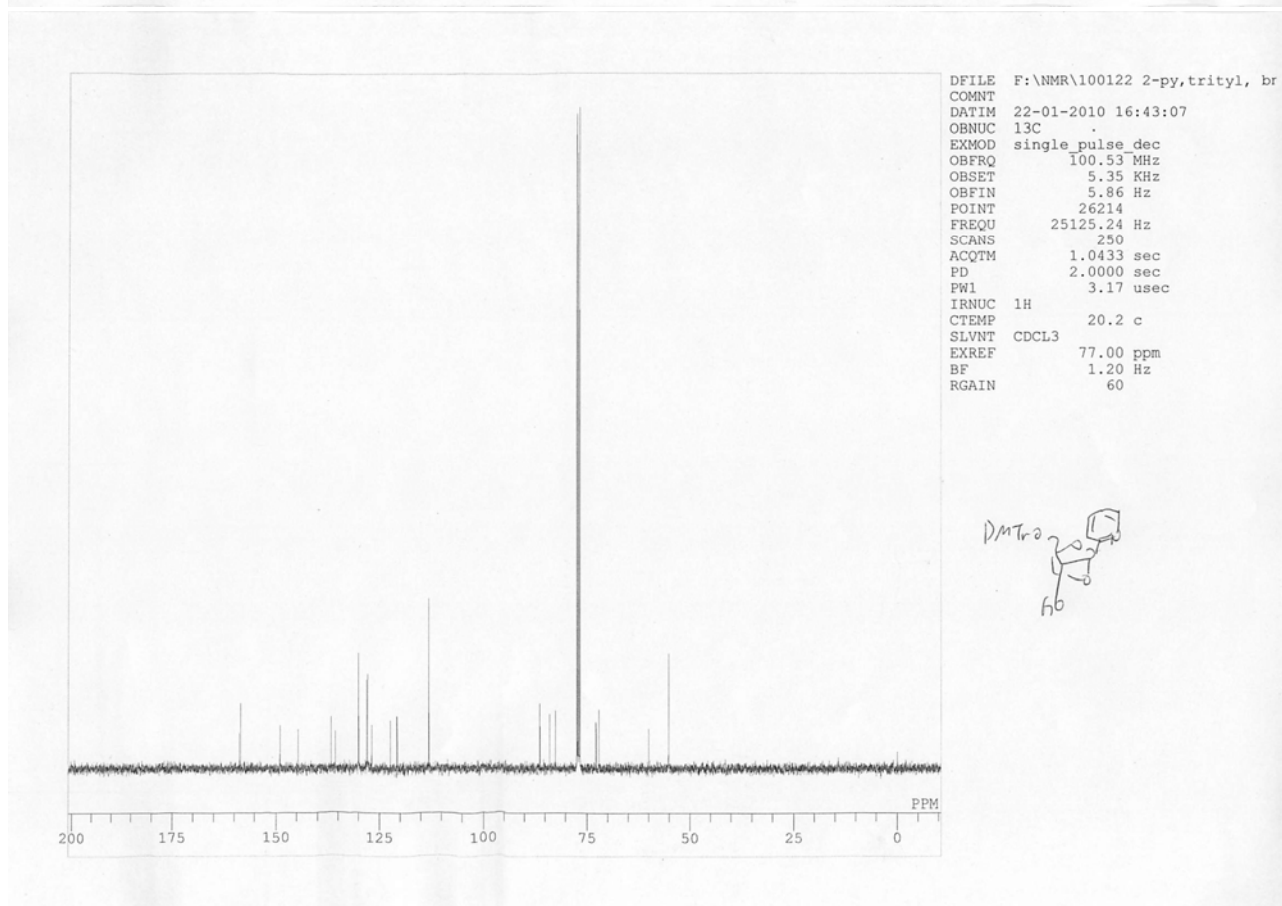

### Compound 7 (diastereoisomers on the basis of chirality at the phosphorus)

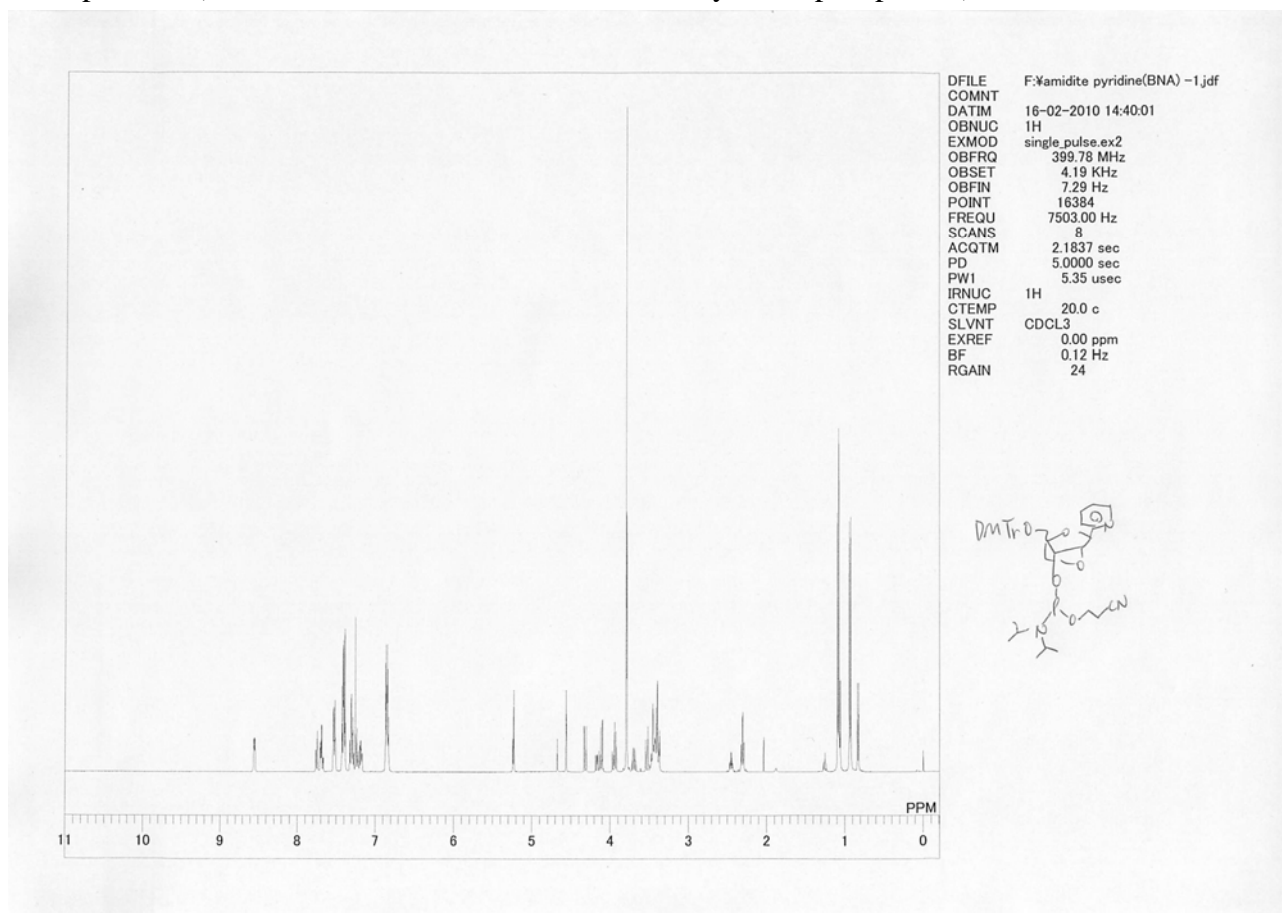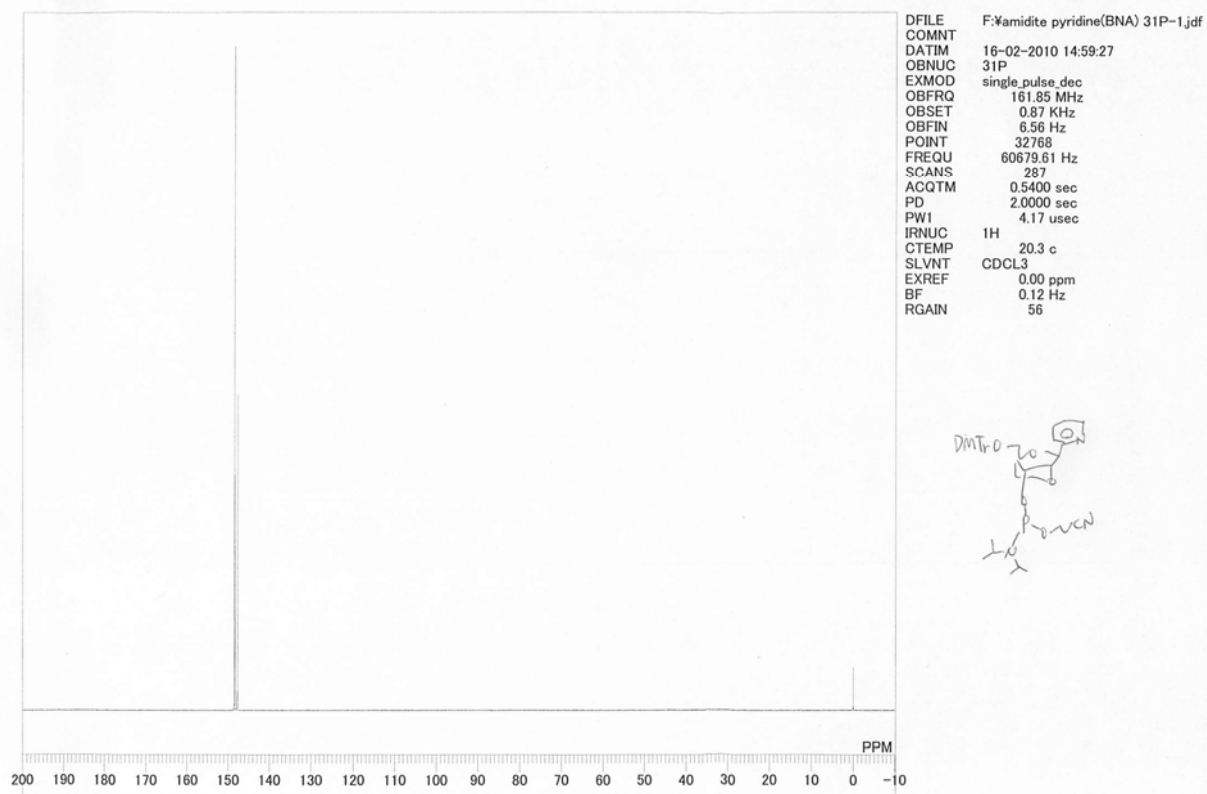

NOESY (compound 3)

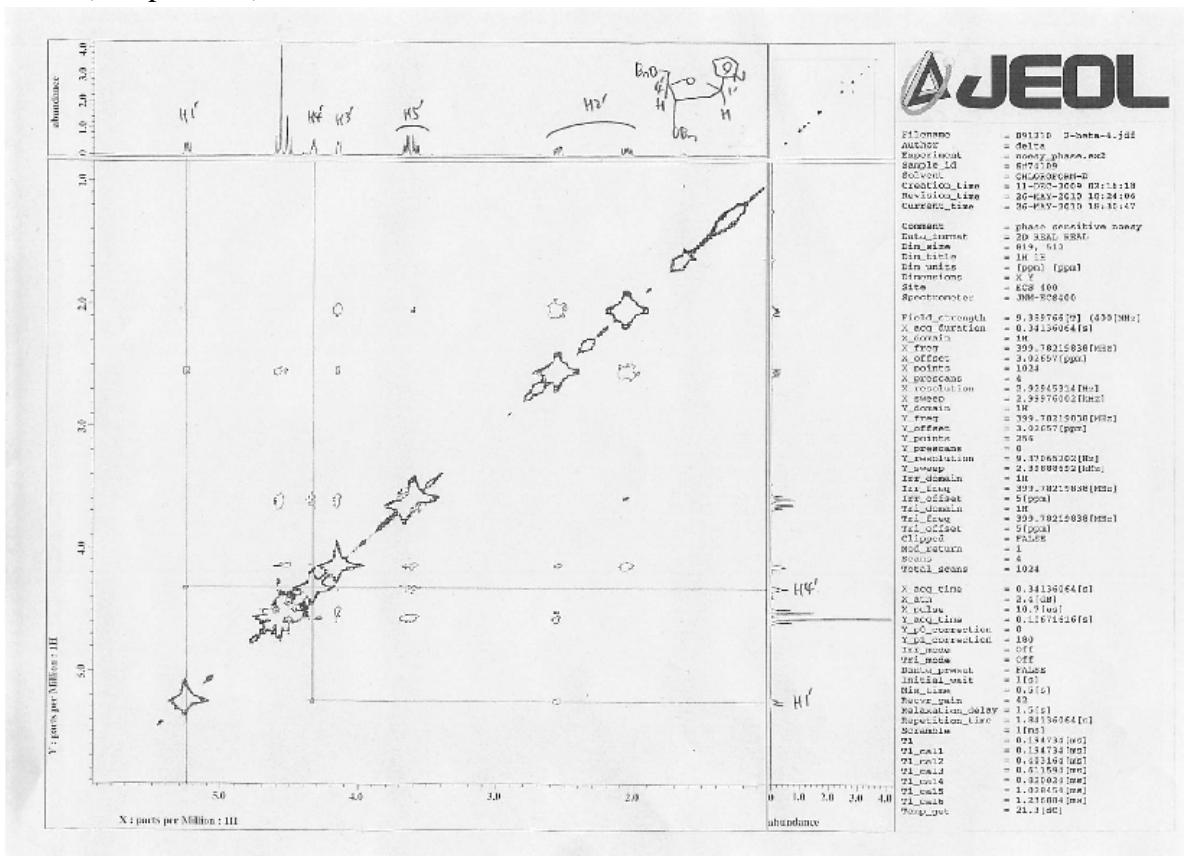

NOESY (compound 4)

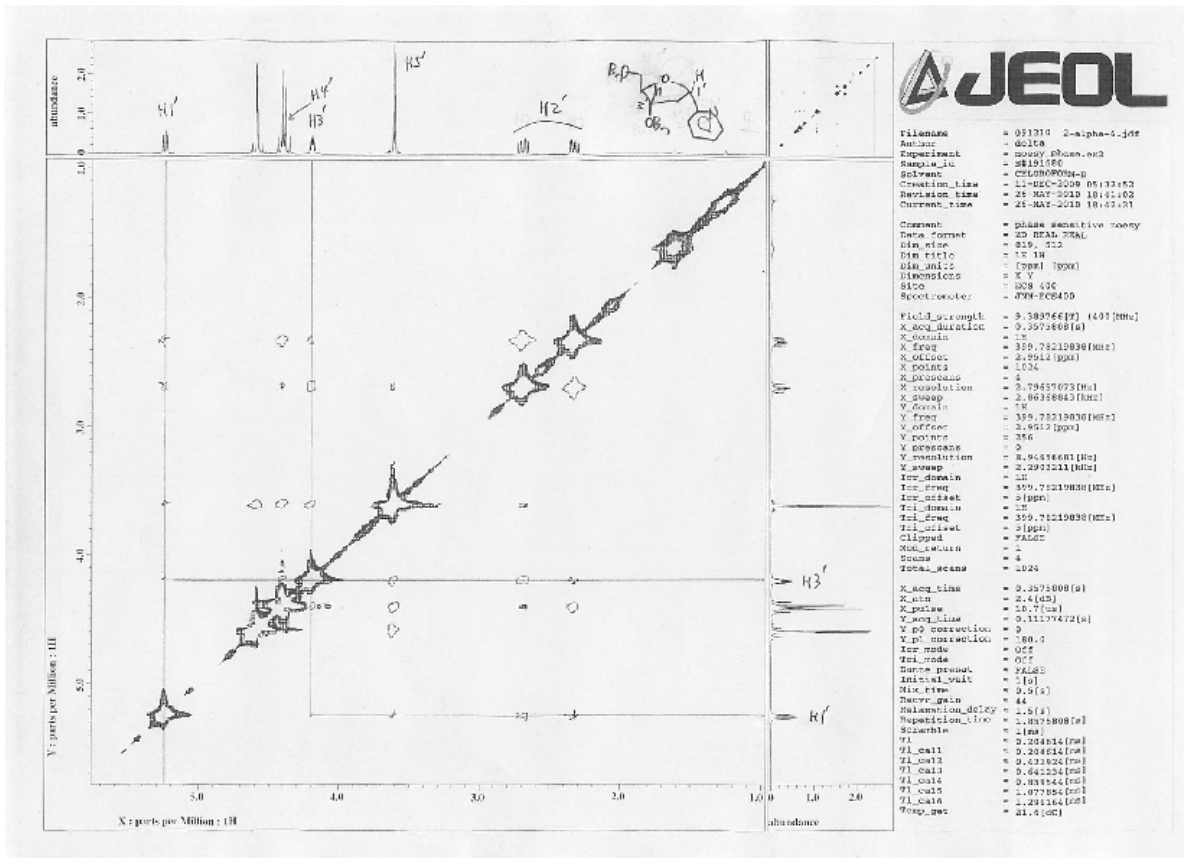

Supplement: c004895j.pdf [file c004895j.pdf]
